# Supplementary material for: Association between socio-environmental factors, coverage by family health teams, and rainfall in the spatial distribution of Zika virus infection in the city of Rio de Janeiro, Brazil, in 2015 and 2016
Source: Springer Nature journal article supplement (doi:10.1186/s12889-021-11249-y), 2021-06-23

# Distribution of GARB\_COLLECT

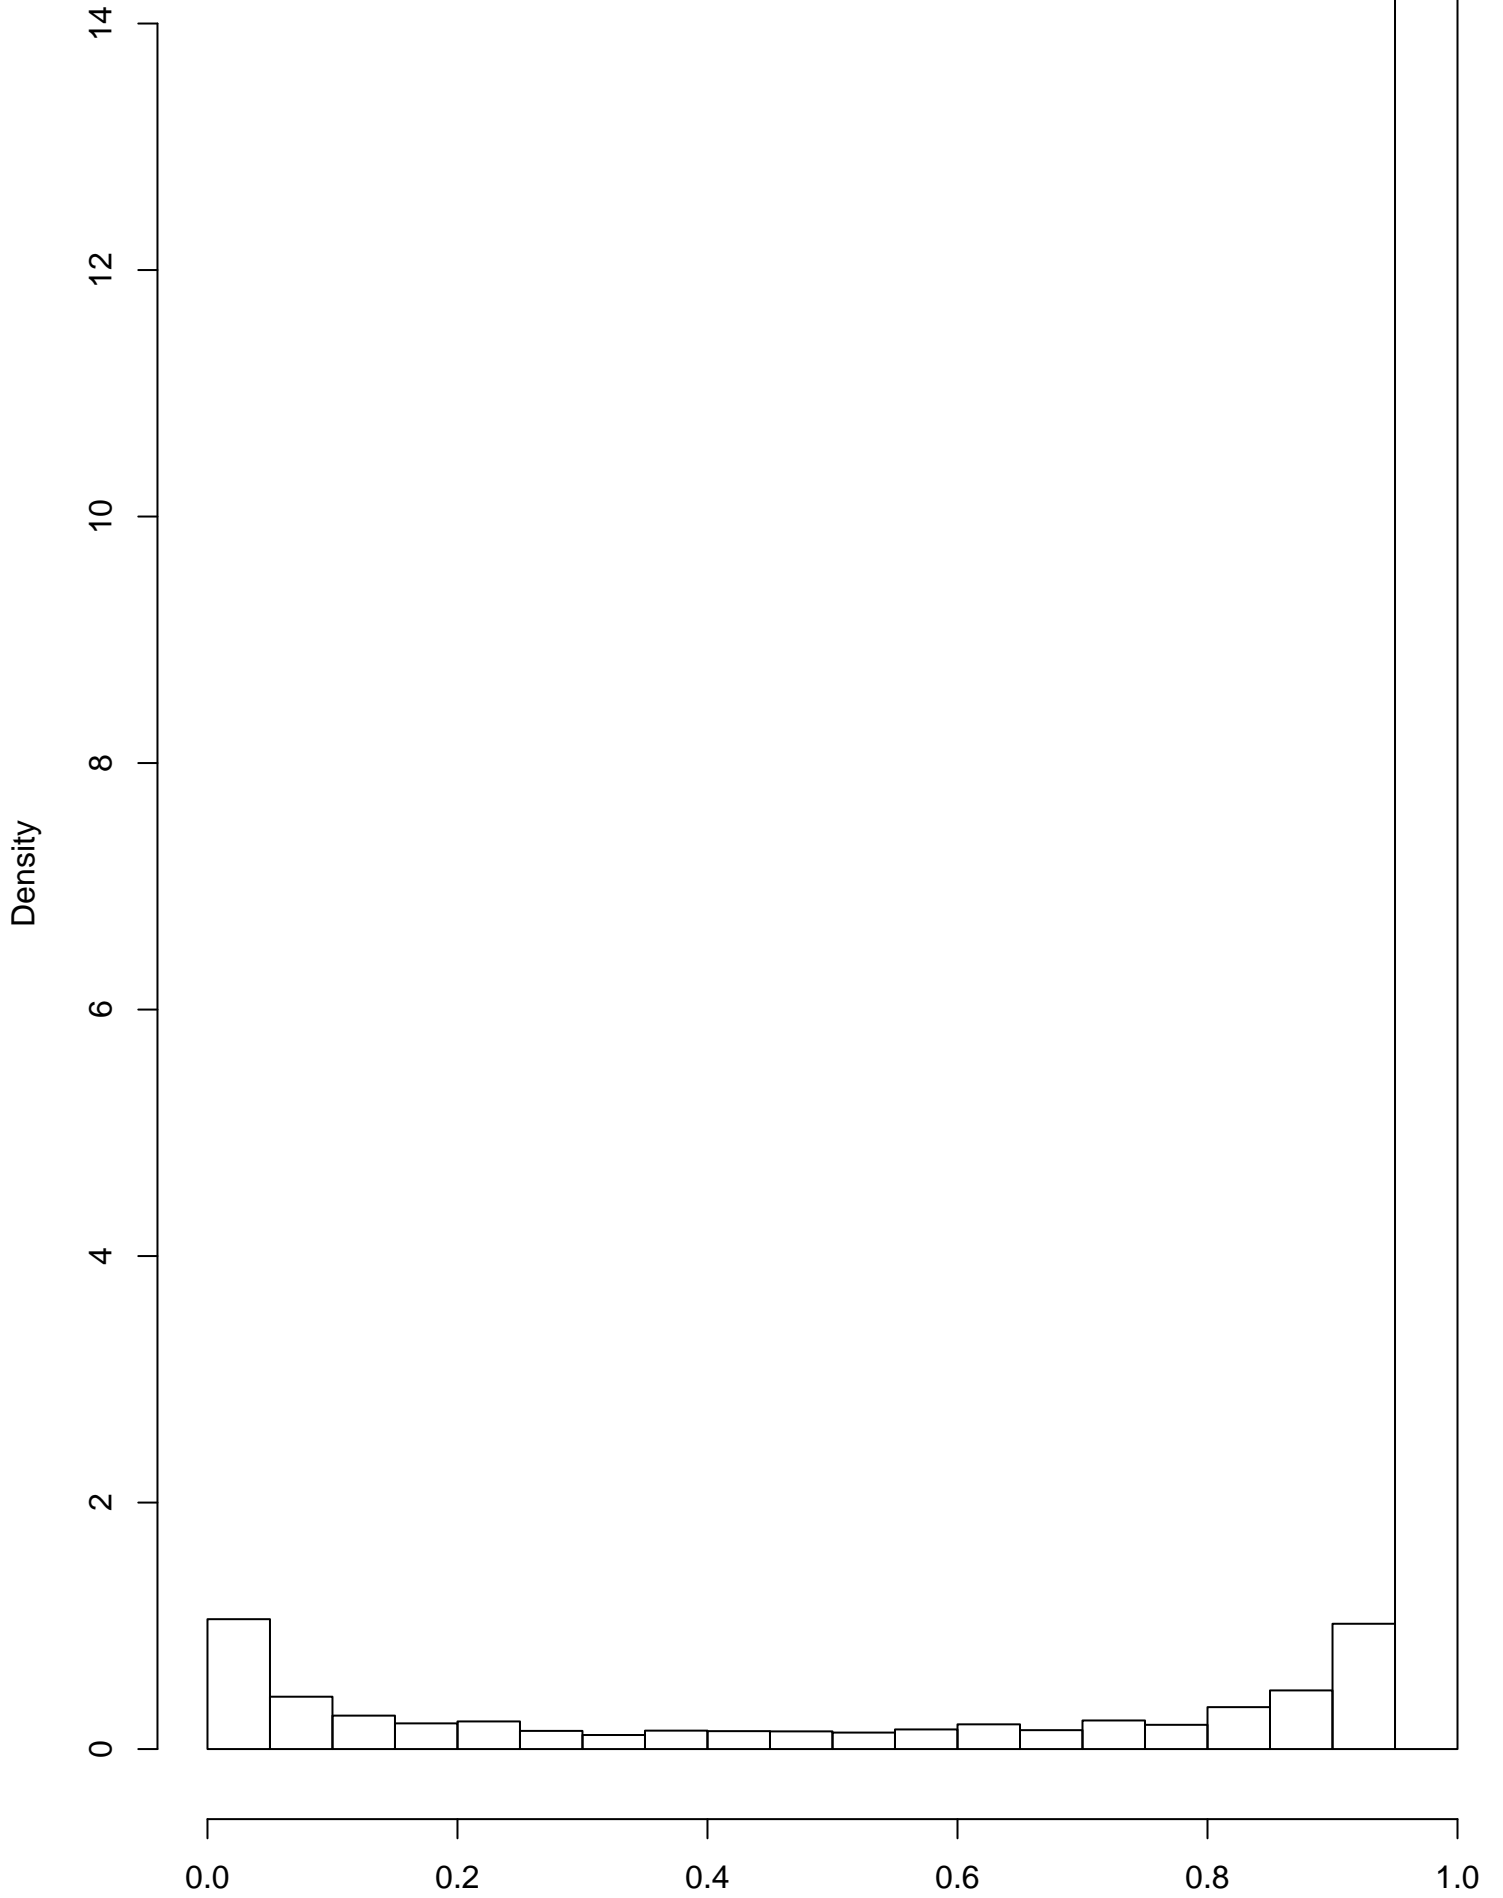

Supplement: MOESM3 [file 19287676]
